# Supplementary material for: Alleviating effects of noni fruit polysaccharide on hepatic oxidative stress and inflammation in rats under a high-fat diet and its possible mechanisms
Source: Royal Society of Chemistry journal article supplement (doi:10.1039/d0fo00178c), 2020-01-01
Supplement: d0fo00178c1.pdf [file d0fo00178c1.pdf]

## Appendix tables

Appendix Table 1 Primer sequence

| Target Gene    | Primer Sequence (5'→3')             | Product Length, bp | Accession No.  |
|----------------|-------------------------------------|--------------------|----------------|
| TNF-a          | Forward (F): GAAACACACGAGACGCTGAAGT | 95                 | NM_012675.3    |
|                | Reverse (R): TCCAGTGAGTTCCGAAAGCC   |                    |                |
| IL-1 $\beta$   | F: CCTCGTGCTGTCTGACCCAT             | 114                | NM_031512.2    |
|                | R: TTGTCGTTGCTTGTCTCTCCTT           |                    |                |
| IL-10          | F: CCAGTCAGCCAGACCCACA              | 108                | NM_012854.2    |
|                | R: GGAATCTGTCAGCAGTATGTTGTC         |                    |                |
| GPR43          | F: GGCACCGAGAACCAAATCAC             | 100                | NM_001005877.1 |
|                | R: CGAAAAAGAGGACCAGGCAC             |                    |                |
| CCL5           | F: GAGGGTCTCTCCATTCTGATCC           | 107                | NM_031116.3    |
|                | R: CCAGGAATGAGTGGGAGTAGG            |                    |                |
| ZO-1           | F: GAGTGGAGAACTGTCAGGCATT           | 124                | NM_001106266.1 |
|                | R: ACTGGCTGGTATTTTTAACGGA           |                    |                |
| Occludin       | F: GATGCTGGTTGCTGGAGAAGT            | 103                | NM_031329.2    |
|                | R: TTCCCAGACGAGAGTCCAAAG            |                    |                |
| $\beta$ -actin | F: AGATGTGGATCAGCAAGCAGG            | 108                | NM_031144.3    |
|                | R: TCAAAGAAAGGGTGTAAAACGC           |                    |                |
| GAPDH          | F: AAGAAGGTGGTGAAGCAGGC             | 119                | NM_017008.4    |
|                | R: CCAGCATCAAAGGTGGAAGAA            |                    |                |

Appendix Table 2 Bacteria distributions of feces from rats in the Control and HFD groups  
(4-week HFD)

|        | Species                                      | Control                            | HFD              |                |
|--------|----------------------------------------------|------------------------------------|------------------|----------------|
| Phylum | <i>Firmicutes</i>                            | 47.02% ± 1.73%                     | 37.89% ± 7.09%   |                |
|        | <i>Bacteroidetes</i>                         | 50.76% ± 1.62%                     | 51.07% ± 7.60%   |                |
|        | <i>Proteobacteria</i>                        | 1.71% ± 0.26%                      | 5.57% ± 1.15%**  |                |
|        | <i>Actinobacteria</i>                        | 0.16% ± 0.03%                      | 5.29% ± 1.65%*   |                |
| Genus  | <i>Bacteroides</i>                           | 5.59% ± 1.89%                      | 25.92% ± 4.20%** |                |
|        | <i>Alloprevotella</i>                        | 7.88% ± 2.10%                      | 4.22% ± 1.18%    |                |
|        | <i>Ruminococcaceae_UCG_014</i>               | 8.88% ± 1.24%                      | 0.04% ± 0.01%**  |                |
|        | <i>Blautia</i>                               | 0.65% ± 0.29%                      | 7.67% ± 2.87%*   |                |
|        | <i>Ruminococcus_1</i>                        | 6.33% ± 1.20%                      | 0.04% ± 0.01%**  |                |
|        | <i>Lactobacillus</i>                         | 5.54% ± 1.75%                      | 0.57% ± 0.20%*   |                |
|        | <i>Prevotellaceae_UCG_001</i>                | 4.29% ± 0.85%                      | 1.34% ± 0.56%*   |                |
|        | <i>Collinsella</i>                           | 0.01% ± 0.006%                     | 4.55% ± 1.63%*   |                |
|        | <i>Parabacteroides</i>                       | 0.61% ± 0.19%                      | 3.29% ± 1.08%*   |                |
|        | <i>Romboutsia</i>                            | 0.67% ± 0.06%                      | 3.04% ± 0.72%*   |                |
|        | <i>Parasutterella</i>                        | 0.79% ± 0.09%                      | 3.26% ± 0.54%**  |                |
|        | <i>Fusicatenibacter</i>                      | 0.01% ± 0.005%                     | 3.86% ± 2.26%    |                |
|        | <i>Turicibacter</i>                          | 0.35% ± 0.08%                      | 3.09% ± 0.97%*   |                |
|        | <i>[Eubacterium]_coprostanoligenes_group</i> | 3.11% ± 0.63%                      | 0.12% ± 0.05%**  |                |
|        | p                                            |                                    |                  |                |
|        |                                              | <i>[Ruminococcus]_gnavus_group</i> | 0.00% ± 0.00%    | 2.95% ± 0.71%* |

Data are expressed as the mean ± SEM (n = 5), \*P < 0.05, \*\*P < 0.01 versus the control group.

Appendix Table 3 Bacteria distributions of feces from rats in the Control, HFD, and NFP groups  
(9-week HFD)

|        | Species                                     | Control               | HFD               | NFP               |                |
|--------|---------------------------------------------|-----------------------|-------------------|-------------------|----------------|
| Phylum | <i>Firmicutes</i>                           | 44.08% ± 3.20%        | 32.74% ± 3.77%    | 40.94% ± 4.59%    |                |
|        | <i>Bacteroidetes</i>                        | 49.44% ± 3.09%        | 55.28% ± 5.35%    | 50.25% ± 4.10%    |                |
|        | <i>Proteobacteria</i>                       | 5.03% ± 0.84%         | 5.09% ± 1.40%     | 4.65% ± 0.54%     |                |
|        | <i>Actinobacteria</i>                       | 0.24% ± 0.06%         | 5.92% ± 1.69%*    | 3.59% ± 0.76%*    |                |
| Genus  | <i>Prevotella_9</i>                         | 0.05% ± 0.02%         | 31.89% ± 7.18%**  | 21.26% ± 3.43%**# |                |
|        | <i>Bacteroides</i>                          | 4.60% ± 0.32%         | 11.37% ± 3.03%*   | 4.33% ± 0.98%#    |                |
|        | <i>Alloprevotella</i>                       | 5.69% ± 1.68%         | 3.32% ± 0.70%     | 4.16% ± 1.67%     |                |
|        | <i>Lactobacillus</i>                        | 7.68% ± 1.87%         | 0.94% ± 0.33%**   | 5.25% ± 1.65%#    |                |
|        | <i>Blautia</i>                              | 0.95% ± 0.35%         | 4.46% ± 0.41%**   | 4.32% ± 0.87%*    |                |
|        | <i>Collinsella</i>                          | 0.06% ± 0.02%         | 5.68% ± 1.67%**   | 3.39% ± 0.97%*    |                |
|        | <i>Romboutsia</i>                           | 1.22% ± 0.13%         | 3.03% ± 0.53%*    | 4.29% ± 0.84%*    |                |
|        | <i>Ruminococcaceae_UCG_014</i>              | 4.95% ± 0.96%         | 0.82% ± 0.24%**   | 1.69% ± 0.37%*    |                |
|        | <i>Parasutterella</i>                       | 2.97% ± 0.75%         | 0.81% ± 0.13%*    | 1.55% ± 0.45%     |                |
|        | <i>Lachnospiraceae_NK4A136_group</i>        | 5.02% ± 1.02%         | 0.04% ± 0.02%**   | 0.42% ± 0.24%**   |                |
|        | <i>Rikenellaceae_RC9_gut_group</i>          | 4.67% ± 0.65%         | 0.007% ± 0.003%** | 0.16% ± 0.08%**   |                |
|        | <i>Allobaculum</i>                          | 0.21% ± 0.09%         | 0.73% ± 0.17%     | 1.82% ± 0.35%**#  |                |
|        | <i>Turicibacter</i>                         | 0.21% ± 0.07%         | 2.93% ± 0.33%**   | 1.32% ± 0.35%#    |                |
|        | <i>[Eubacterium]_coprostanoligenes_grou</i> | 0.93% ± 0.17%         | 0.52% ± 0.22%     | 2.38% ± 0.73%#    |                |
|        | p                                           |                       |                   |                   |                |
|        |                                             | <i>Ruminococcus_1</i> | 1.73% ± 0.21%     | 0.17% ± 0.09%**   | 1.36% ± 0.38%# |

Data are expressed as the mean ± SEM (n = 6). \*P < 0.05, \*\*P < 0.01 versus the control group, #P < 0.05 versus the HFD group.
